# Supplementary material for: Full-Length Transcriptomic Identification of R2R3-MYB Family Genes Related to Secondary Cell Wall Development in Cunninghamia Lanceolata (Chinese Fir)
Source: Research Square preprint supplement (doi:10.21203/rs.3.rs-209486/v1), 2021-03-09
Supplement: Supplementary file [file 0eebe7df53a637a2afa871ba.pdf]

# Full-length transcriptomic identification of R2R3-MYB family genes related to secondary cell wall development in *Cunninghamia lanceolata* (Chinese fir)

Hebi Zhuang<sup>1§</sup>, Sun-Li Chong<sup>1§</sup>, Borah Priyanka<sup>1</sup>, Xiao Han<sup>1</sup>, Erpei Lin<sup>1</sup>, ZaiKang Tong<sup>1</sup>, HuaHong Huang<sup>1</sup>

<sup>1</sup>State key Laboratory of Subtropical Silviculture, Zhejiang A/F University, Lināan, Hangzhou 311300, China

<sup>§</sup>These authors contributed equally to this work

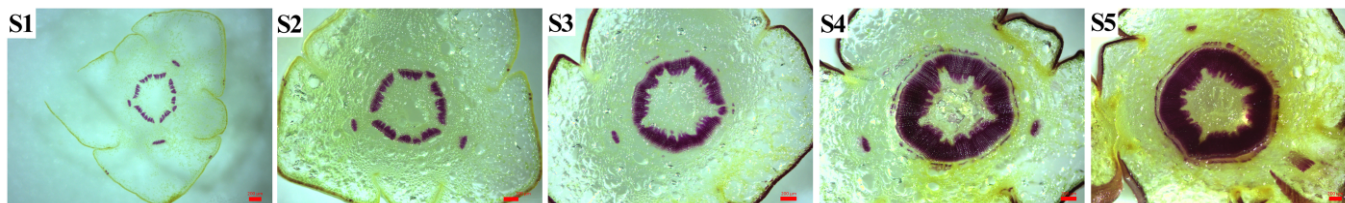

**Figure S1.** Cross-sections stained with Phloroglucinol-HCl for the different lignification stems of *C. lanceolata*. Five stem segments from the top to bottom of a one-year-old branch were collected and marked sequentially S1, S2, S3, S4, and S5.
