# Supplementary material for: Full-Length Transcriptomic Identification of R2R3-MYB Family Genes Related to Secondary Cell Wall Development in Cunninghamia Lanceolata (Chinese Fir)
Source: Research Square preprint supplement (doi:10.21203/rs.3.rs-209486/v1), 2021-03-09
Supplement: Supplementary file [file c17bbe784f919f3fa7f80310.pdf]

# Full-length transcriptomic identification of R2R3-MYB family genes related to secondary cell wall development in *Cunninghamia lanceolata* (Chinese fir)

Hebi Zhuang<sup>1§</sup>, Sun-Li Chong<sup>1§</sup>, Borah Priyanka<sup>1</sup>, Xiao Han<sup>1</sup>, Erpei Lin<sup>1</sup>, ZaiKang Tong<sup>1</sup>, HuaHong Huang<sup>1</sup>

<sup>1</sup>State Key Laboratory of Subtropical Silviculture, Zhejiang A&F University, Lin'an, Hangzhou 311300, China

<sup>§</sup>These authors contributed equally to this work

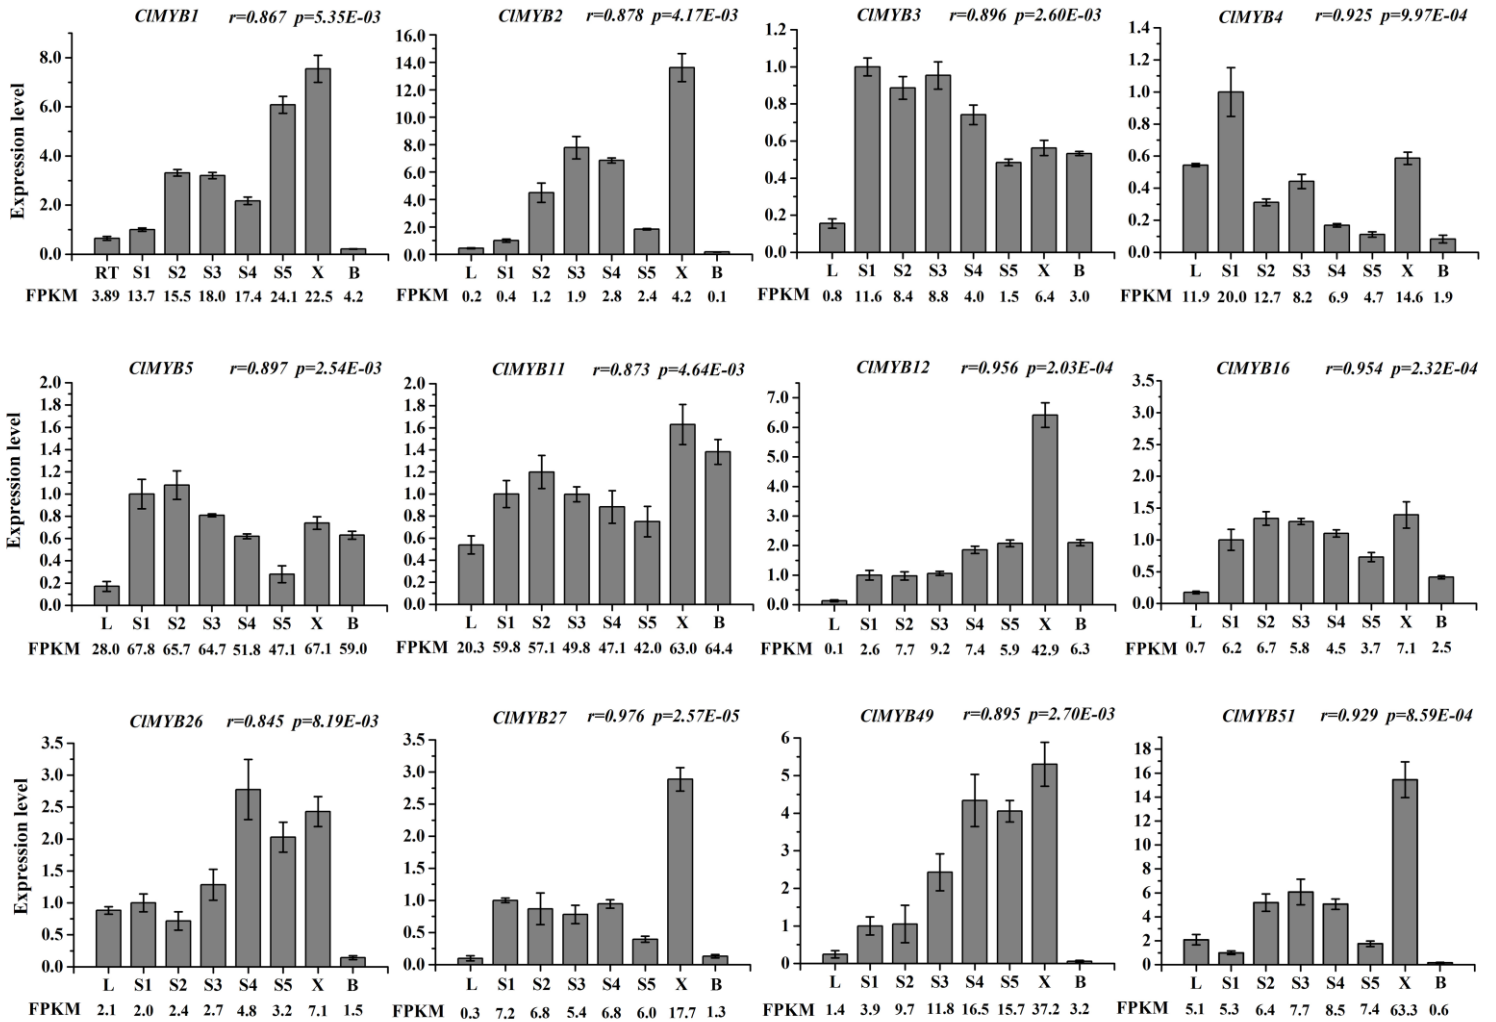

**Figure S1.** Expression profiles of 12 *CIMYB* genes in eight organs and tissues using qRT-PCR. Data were normalised to *ClActin* gene. The expression level in S1 was used as a reference and was set at 1. Error bars indicate standard deviation of three biological replicates. The corresponding FPKM values were listed. The  $r$  represented the correlation coefficient between qRT-PCR and RNA-Seq data, and the  $p$  was the P-value. L:leaves, S1-5: stem segments from top to bottom, X: xylem, B: bark
